# Supplementary material
Source: publisher site journal article supplement (https://www.spandidos-publications.com/7889/downloadSupplementary)

Figure S1. Funnel plot. (A) Funnel plot of the estimated associations of (A) UF on hOA, (B) hOA on UF, (C) UF on kOA and (D) kOA on UF. UF, uterine fibroids; OA, osteoarthritis; hOA, hip OA; kOA, knee OA; IV, instrumental variables; MR, mendelian randomization;  $SE_{IV}$ , standard error of IVs.

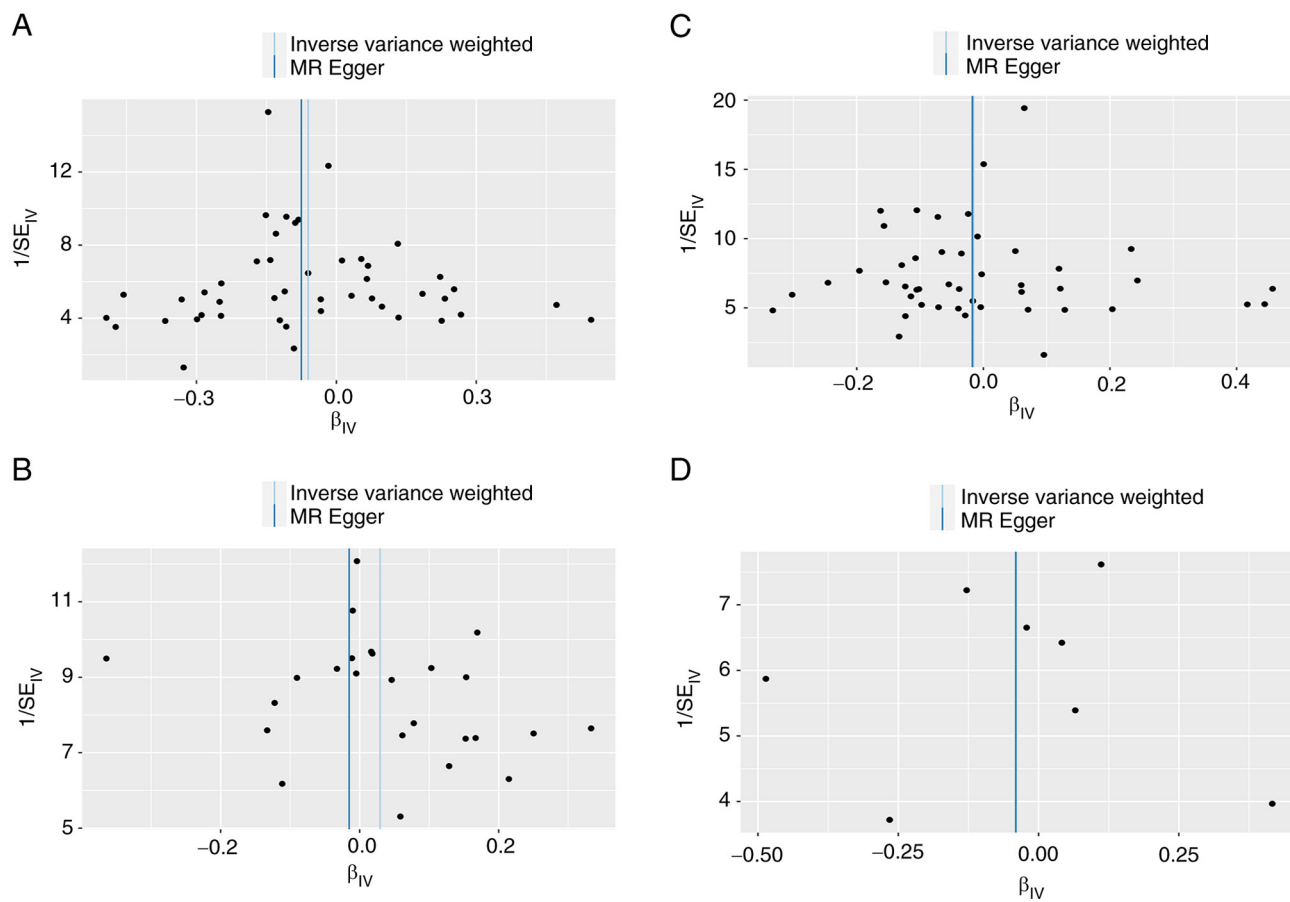

Supplement: Supplementary file 1 [file downloadSupplementary]
